# Supplementary material for: Magnetic nanoparticle-mediated non-invasive imaging and eradication of lymph nodes
Source: Royal Society of Chemistry journal article supplement (doi:10.1039/d4nr04772a), 2024-12-06
Supplement: d4nr04772a1.pdf [file d4nr04772a1.pdf]

## **Magnetic nanoparticle-mediated non-invasive imaging and eradication of lymph node**

Wei Gao<sup>1,2</sup>, Xiaojun Cai<sup>1,2</sup>, Yan Wang<sup>2</sup>, Dechao Niu<sup>3\*</sup>, Yuanyi Zheng<sup>1,2\*</sup>

<sup>1</sup>Shanghai Key Laboratory of Neuro-Ultrasound for Diagnosis and Treatment, Shanghai Sixth People's Hospital Affiliated to Shanghai Jiao Tong University School of Medicine, Shanghai 200233, P. R. China

Email: [zhengyuanyi@sjtu.edu.cn](mailto:zhengyuanyi@sjtu.edu.cn)

<sup>2</sup>Department of Ultrasound in Medicine, Shanghai Sixth People's Hospital Affiliated to Shanghai Jiao Tong University School of Medicine, Shanghai, 200233, P. R. China.

<sup>3</sup>Lab of Low-Dimensional Materials Chemistry, Key Laboratory for Ultrafine Materials of Ministry of Education, Shanghai Engineering Research Center of Hierarchical Nanomaterials, School of Materials Science and Engineering, East China University of Science and Technology, Shanghai 200237, P. R. China

Email: [dcniu@ecust.edu.cn](mailto:dcniu@ecust.edu.cn)

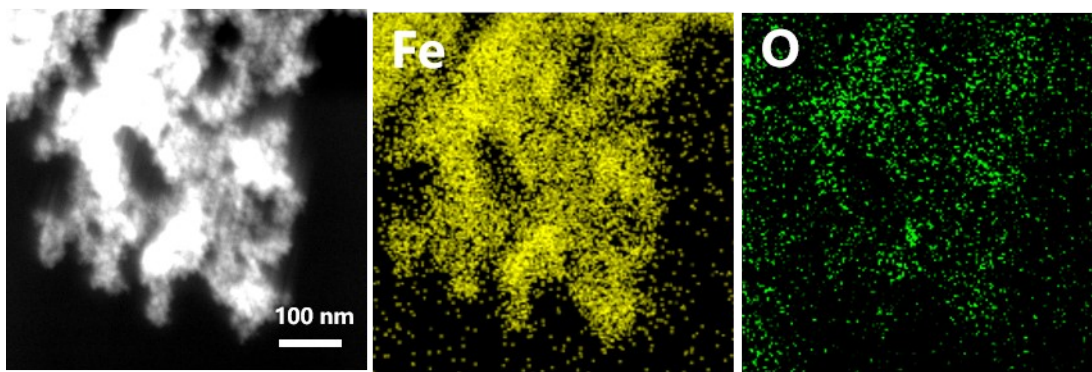

Figure S1. High-angle annular dark field image of CMNP and elemental mappings of Fe and O elements.

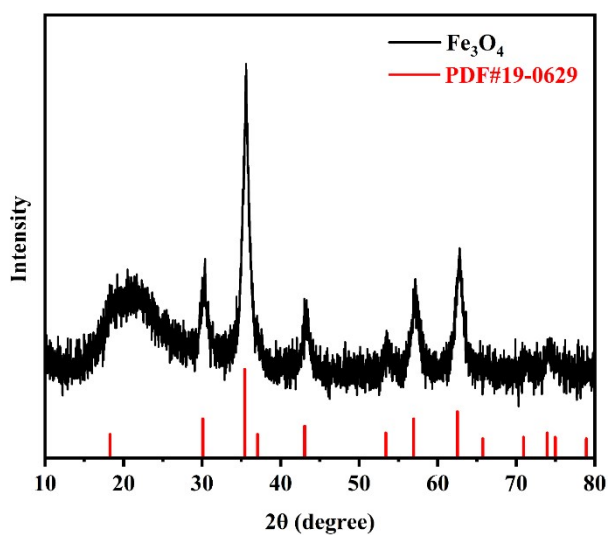

Figure S2. XRD patterns of CMNP and Fe<sub>3</sub>O<sub>4</sub> (JCPDS card no. 19-0629).

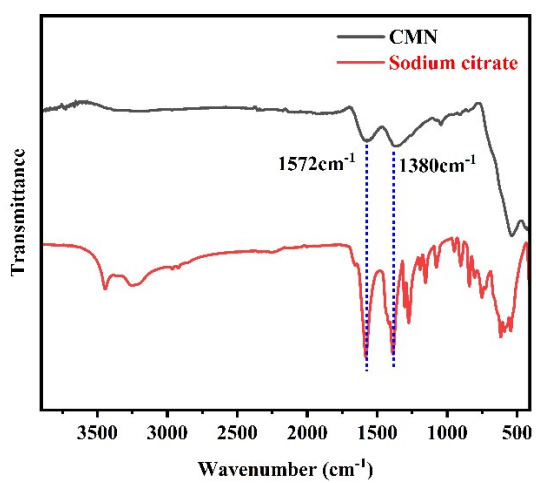

Figure S3. Fourier transform infrared spectroscopy of CMNP and sodium citrate.

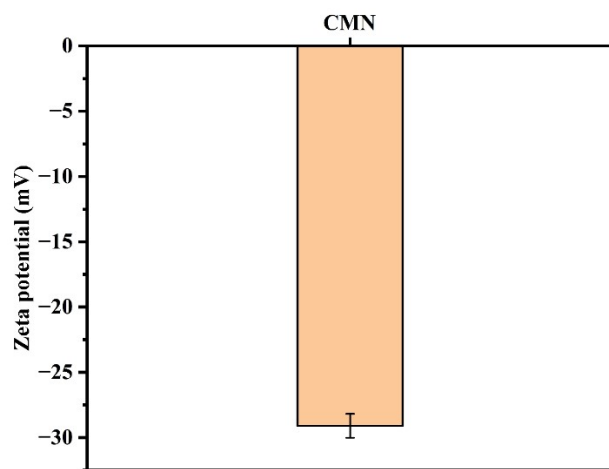

Figure S4. Zeta potential of CMNP in water.
